# Supplementary material for: A-loop interactions in Mer tyrosine kinase give rise to inhibitors with two-step mechanism and long residence time of binding
Source: PubMed Central journal article supplement — Biochem J. 2020 Nov 27;477(22):4443–52. doi: 10.1042/BCJ20200735 (PMC7702301; doi:10.1042/bcj20200735), 2020-11-27

**Supplementary Figure 1. MerTK and Axl activation loops are conserved in their sequences.**

Sequence alignment of Axl and MerTK kinase domains, generated with UniProtKB sequences P30530 and Q12866, using the program ALINE [36]. The secondary structure of apo-MerTK PDB entry 7AB0 is superimposed on top of the sequences. Secondary structure elements are labelled according to Fabbro et al. [8]; with  $\alpha$ -helices depicted as tubes,  $\beta$ -strands as arrows, 310 helices as spirals and disordered regions as dashed lines. The position of DFG-motif, APE-motif and A-loop are indicated, variant residues are highlighted in red.

**Supplementary Figure 2. Binding analysis for MerTK by surface plasmon resonance.**

Sensorgrams are presented for gilteritinib (A, B), LDC1267 (C, D), merestinib (E, F) and EX172 (G, H) for binding to dephosphorylated MerTK (A, C, E, G) and autophosphorylated MerTK (B, D, F, H).

**Supplementary Figure 3. Disorder of the activation loop in MerTK crystal structures.**

(A) The superposition of all MerTK PDB entries and apo structure 7AB0 highlights the conformational conformity of the kinase domain and the general absence of the A-loop. Sequences of all residues included in the coordinates were extracted and aligned, with A-loop residues 736-770 depicted in (B). (B) PDB ID and model chain are indicated. For clarity a reference sequence of MerTK was added at the bottom of the alignment, and the location of DFG-motif, APE-motif and A-loop highlighted.

**Supplementary Table 1. Details and refinement statistics of the crystal structures presented.**

Values in parentheses are for the highest-resolution shell.

| PDB entry                           | 7AB1                                    | 7AB2                                    | 7AAX                                    | 7AAY                               | 7AAZ                   | 7AB0                                    |
|-------------------------------------|-----------------------------------------|-----------------------------------------|-----------------------------------------|------------------------------------|------------------------|-----------------------------------------|
| MerTK construct                     | GSHM_E571-V864, K591R/K693R/K702R/K856R | GSHM_E571-V864, K591R/K693R/K702R/K856R | GSHM_E571-V864, K591R/K693R/K702R/K856R | GSHM_E571-V864, $\Delta$ M659-Q662 | GS_E571-V864           | GSHM_E571-V864, K591R/K693R/K702R/K856R |
| ligand                              | gilteritinib                            | UNC2025                                 | LDC1267                                 | merestinib                         | EX172                  | apo                                     |
| Complex formation                   | soak                                    | soak                                    | co-cryst.                               | co-cryst.                          | co-cryst.              | N/A                                     |
| <b>Data Collection</b>              |                                         |                                         |                                         |                                    |                        |                                         |
| Beamline                            | DLS i03                                 | DLS i04                                 | DLS i03                                 | DLS i02                            | DLS i03                | DLS i04                                 |
| Date                                | 2020-01-23                              | 2020-02-07                              | 2016-07-22                              | 2016-08-02                         | 2017-08-11             | 2019-12-05                              |
| Detector                            | Eiger 16M                               | Eiger 16M                               | PILATUS3 6M                             | PILATUS 6M-F                       | PILATUS3 6M            | Eiger 16M                               |
| Wavelength (Å)                      | 0.976254                                | 0.979499                                | 0.97623                                 | 0.97949                            | 0.97627                | 0.97950                                 |
| <b>AutoPROC / STARANISO</b>         |                                         |                                         |                                         |                                    |                        |                                         |
| Space group                         | C 2 2 21                                | C 2 2 21                                | C 2 2 21                                | C 2 2 21                           | P 43 21 2              | C 2 2 21                                |
| Cell: a b c (Å)                     | 93.3 94.1 70.7                          | 91.9 92.0 71.6                          | 92.7 92.8 71.0                          | 93.1 131.0 54.2                    | 78.6 78.6 137.5        | 91.6 91.6 71.6                          |
| Cell: $\alpha$ $\beta$ $\gamma$ (°) | 90.0 90.0 90.0                          | 90.0 90.0 90.0                          | 90.0 90.0 90.0                          | 90.0 90.0 90.0                     | 90.0 90.0 90.0         | 90.0 90.0 90.0                          |
| Resolution (Å)                      | 46.66-1.93 (2.05-1.93)                  | 48.14-1.78 (1.96-1.78)                  | 65.59-1.76 (1.89-1.76)                  | 46.56-1.86 (2.08-1.86)             | 68.25-1.86 (1.97-1.86) | 48.04-1.74 (1.98-1.74)                  |
| Rmeas (%)                           | 12.5 (126.9)                            | 4.0 (118.1)                             | 4.2 (81.1)                              | 11.8 (91.0)                        | 13.8 (227.8)           | 5.5 (98.4)                              |
| Reflections, total                  | 100656 (4179)                           | 119488 (5299)                           | 139432 (4651)                           | 120285 (3353)                      | 403632 (18945)         | 114741 (5092)                           |
| Reflections, unique                 | 18953 (949)                             | 18168 (908)                             | 23363 (1169)                            | 19081 (954)                        | 32643 (1634)           | 17430 (872)                             |
| Mean(I)/sd(I)                       | 9.8 (1.5)                               | 21.0 (1.5)                              | 19.0 (1.5)                              | 10.6 (1.4)                         | 13.1 (1.4)             | 16.3 (1.7)                              |
| Completeness, ellipsoidal (%)       | 88.3 (56.3)                             | 93.8 (64.0)                             | 89.1 (42.9)                             | 93.8 (63.6)                        | 95.7 (59.4)            | 93.2 (67.3)                             |
| Multiplicity                        | 5.3 (4.4)                               | 6.6 (5.8)                               | 6.0 (4.0)                               | 6.3 (3.5)                          | 12.4 (11.6)            | 6.6 (5.8)                               |
| CC(1/2) (%)                         | 99.6 (80.8)                             | 100.0 (63.5)                            | 100.0 (70.2)                            | 99.8 (58.2)                        | 99.9 (53.8)            | 100.0 (70.9)                            |
| <b>Model</b>                        |                                         |                                         |                                         |                                    |                        |                                         |
| Structure Determination             | molecular replacement                   | molecular replacement                   | molecular replacement                   | molecular replacement              | molecular replacement  | molecular replacement                   |
| molecules / AU                      | 1                                       | 1                                       | 1                                       | 1                                  | 1                      | 1                                       |
| <b>REFMAC5</b>                      |                                         |                                         |                                         |                                    |                        |                                         |
| Rwork (%) / Rfree (%)               | 23.4 / 29.8                             | 19.3 / 25.0                             | 19.9 / 25.3                             | 19.4 / 22.4                        | 18.8 / 21.9            | 20.7 / 24.7                             |

|                                       |       |       |       |       |       |       |
|---------------------------------------|-------|-------|-------|-------|-------|-------|
| B value ( $\text{\AA}^2$ ), protein   | 55.0  | 49.7  | 48.5  | 37.1  | 40.5  | 43.0  |
| B value ( $\text{\AA}^2$ ), ligand    | 65.3  | 82.6  | 46.9  | 28.9  | 30.6  | NA    |
| B value ( $\text{\AA}^2$ ), water     | 51.8  | 48.0  | 46.5  | 34.6  | 44.5  | 44.0  |
| B value ( $\text{\AA}^2$ ), solvent   | 72.1  | 65.5  | 46.7  | 33.0  | 40.8  | 45.2  |
| N° of atoms, protein                  | 2075  | 2138  | 2154  | 2162  | 2279  | 2147  |
| N° of atoms, ligand                   | 40    | 35    | 41    | 41    | 43    | NA    |
| N° of atoms, water                    | 54    | 89    | 87    | 117   | 132   | 132   |
| N° of atoms, solvent                  | 8     | 12    | 3     | 3     | 14    | 5     |
| rmsd<br>bond lengths ( $\text{\AA}$ ) | 0.012 | 0.013 | 0.012 | 0.009 | 0.012 | 0.009 |
| rmsd<br>bond angles ( $^\circ$ )      | 1.54  | 1.52  | 1.50  | 1.30  | 1.47  | 1.32  |
| <b>MOL Probity [37]</b>               |       |       |       |       |       |       |
| Ramachandran favored<br>(%)           | 95.5  | 97.0  | 97.0  | 97.4  | 97.6  | 98.5  |
| Ramachandran outliers<br>(%)          | 1.1   | 0.0   | 0.0   | 0.0   | 0.4   | 0.0   |

**Supplementary Table 2. Biochemical inhibition of 395 human kinases by EX172.**

Inhibition was determined at a compound concentration of 0.1  $\mu$ M (ThermoFisher SelectScreen Kinase Profiling Services). The table is sorted by mean inhibition.

| Kinase Name           | Mean Inhibition (%) | Molecular Target                                          |
|-----------------------|---------------------|-----------------------------------------------------------|
| MERTK (cMER)          | 101                 | c-mer Proto-Oncogene Tyrosine Kinase                      |
| MERTK (cMER)          | 98                  | c-mer Proto-Oncogene Tyrosine Kinase                      |
| AXL                   | 97                  | AXL Receptor Tyrosine Kinase                              |
| CHEK2 (CHK2)          | 55                  | Checkpoint Kinase 2                                       |
| NTRK1 (TRKA)          | 32                  | Neurotrophic Receptor Tyrosine Kinase Type 1              |
| TYRO3 (RSE)           | 31                  | TYRO3 Protein Tyrosine Kinase                             |
| MST4                  | 29                  | Mammalian STE20-like Protein Kinase 4                     |
| STK38L (NDR2)         | 28                  | Serine/Threonine Kinase 38 like                           |
| MAP2K4 (MEK4)         | 28                  | Mitogen-Activated Protein Kinase Kinase 4                 |
| SGKL (SGK3)           | 24                  | Serum/glucocorticoid Regulated Kinase 3                   |
| MAPK9 (JNK2)          | 22                  | Mitogen Activated Protein Kinase 9                        |
| CAMKK1 (CAMKKA)       | 21                  | Calmodulin Dependent Kinase Kinase Alpha                  |
| MAP2K1 (MEK1)         | 21                  | Mitogen Activated Protein Kinase Kinase 1                 |
| RPS6KA2 (RSK3)        | 21                  | Ribosomal Protein S6 Kinase polypeptide 2                 |
| PKN2 (PRK2)           | 20                  | Protein Kinase C Related Kinase 2                         |
| MELK                  | 20                  | Maternal Embryonic Leucine Zipper Kinase                  |
| NLK                   | 18                  | Nemo-like Kinase                                          |
| CDK17/cyclin Y        | 18                  | PCTAIRE Protein Kinase 2                                  |
| DNA-PK                | 18                  | DNA-dependent Protein Kinase                              |
| SNF1LK2               | 17                  | SNF1-like Kinase 2                                        |
| PRKCG (PKC gamma)     | 17                  | Protein Kinase C gamma                                    |
| LATS1                 | 17                  | LATS, large tumor suppressor, homolog 1 (Drosophila)      |
| AMPK (A1/B2/G3)       | 16                  | AMP-activated Protein Kinase?                             |
| FLT3                  | 15                  | fms-Related Tyrosine Kinase 3                             |
| RPS6KB2 (p70S6Kb)     | 15                  | Ribosomal Protein S6 Kinase, 70kDa, polypeptide 2         |
| STK22D (TSSK1)        | 14                  | Testis-specific Serine Kinase 1B                          |
| PRKCA (PKC alpha)     | 14                  | Protein Kinase C alpha                                    |
| ZAP70                 | 14                  | Zeta Chain Associated Protein Kinase                      |
| STK17B (DRAK2)        | 14                  | Serine/Threonine Kinase 17b                               |
| SRC                   | 13                  | v-src sarcoma (Schmidt-Ruppin A-2) viral oncogene homolog |
| MAP4K1 (HPK1)         | 13                  | Mitogen-Activated Protein Kinase Kinase Kinase Kinase 1   |
| STK24 (MST3)          | 13                  | Serine/Threonine Kinase 24 (STE20 homolog, yeast)         |
| ACVR1B (ALK4)         | 13                  | Activin A Receptor type IB                                |
| MAPK10 (JNK3)         | 13                  | Mitogen-activated protein kinase 10                       |
| MAP2K1 (MEK1)         | 13                  | Mitogen Activated Protein Kinase Kinase 1                 |
| TAOK2 (TAO1)          | 12                  | TAO Kinase 2                                              |
| CDC42 BPG (MRCKG)     | 12                  | CDC42 Binding Protein Kinase gamma (DMPK-like)            |
| CDC42 BPA (MRCKA)     | 12                  | CDC42 Binding Protein Kinase alpha (DMPK-like)            |
| STK38 (NDR)           | 12                  | Serine/Threonine kinase 38                                |
| PAK3                  | 12                  | p21 (CDKN1A)-activated Kinase 3                           |
| CSNK2A1 (CK2 alpha 1) | 12                  | Casein Kinase 2, alpha 1 polypeptide                      |
| IRAK3                 | 12                  | Interleukin-1 Receptor-Associated Kinase 3                |
| DAPK2                 | 12                  | Death-Associated Protein Kinase 2                         |
| TBK1                  | 12                  | TANK-binding Kinase 1                                     |
| PRKCE (PKC epsilon)   | 11                  | Protein Kinase C epsilon                                  |
| MAP2K2 (MEK2)         | 11                  | Mitogen-Activated Protein Kinase Kinase 2                 |
| LYN B                 | 11                  | v-yes-1 Yamaguchi sarcoma viral related oncogene homolog  |
| STK25 (YSK1)          | 11                  | Serine/Threonine Kinase 25 (STE20 homolog, yeast)         |
| PRKCN (PKD3)          | 11                  | Protein Kinase D3                                         |
| CSNK1G1 (CK1 gamma 1) | 11                  | Casein Kinase 1 gamma 1                                   |
| PIK3CG (p110 gamma)   | 11                  | Phosphoinositide 3 Kinase Gamma (PI3K Gamma)              |
| VRK2                  | 11                  | Vaccinia Related Kinase 2                                 |
| EPHA4                 | 11                  | EPH Receptor A4                                           |
| PHKG1                 | 11                  | Phosphorylase Kinase, gamma 1 (muscle)                    |
| IKBKE (IKK epsilon)   | 11                  | I Kappa B Kinase Epsilon                                  |

|                           |    |                                                                                              |
|---------------------------|----|----------------------------------------------------------------------------------------------|
| SRMS (Srm)                | 11 | Src-related Kinase Lacking C-terminal Regulatory Tyrosine and N-terminal Myristylation Sites |
| CDK7/cyclin H/MNAT1       | 11 | Cyclin Dependent Kinase 6:Cyclin H:MNAT1                                                     |
| DYRK1A                    | 11 | Dual Specificity Tyrosine Phosphorylation Regulated Kinase 1A                                |
| SIK3                      | 11 | SIK Family Kinase 3                                                                          |
| SBK1                      | 10 | SH3-Binding Domain Kinase 1                                                                  |
| MAPK14 (p38 alpha) Direct | 10 | Mitogen-Activated Protein Kinase 14                                                          |
| MAPK7 (ERK5)              | 10 | Mitogen-Activated Protein Kinase 7                                                           |
| NEK6                      | 10 | NIMA (never in mitosis gene a)-related kinase 6                                              |
| PRKCB2 (PKC beta II)      | 10 | Protein Kinase C beta 1                                                                      |
| BRAF                      | 10 | v-raf Murine Sarcoma Viral Oncogene Homolog B1                                               |
| RAF1 (cRAF) Y340D Y341D   | 10 | v-raf murine leukemia viral oncogene homolog 1                                               |
| TAOK3 (JIK)               | 10 | TAO Kinase 3                                                                                 |
| SGK2                      | 9  | Serum/gluocorticoid Regulated Kinase 2                                                       |
| PHKG2                     | 9  | Phosphorylase Kinase gamma 2                                                                 |
| PKN1 (PRK1)               | 9  | Protein Kinase N1                                                                            |
| TEK (Tie2)                | 9  | Tie2 receptor tyrosine kinase                                                                |
| CSNK2A2 (CK2 alpha 2)     | 9  | Casein Kinase 2 alpha prime polypeptide                                                      |
| MUSK                      | 9  | Muscle Skeletal Receptor Tyrosine Kinase                                                     |
| CSNK1A1 (CK1 alpha 1)     | 9  | Casein Kinase 1, alpha 1                                                                     |
| KDR (VEGFR2)              | 9  | Kinase Insert Domain Receptor                                                                |
| PIK3C2A (PI3K-C2 alpha)   | 9  | PIK3C2A phosphatidylinositol-4-phosphate 3-kinase, catalytic subunit type 2 alpha            |
| MAPK11 (p38 beta)         | 9  | Stress Activated Protein Kinase 2b                                                           |
| CDKL5                     | 9  | Cyclin-Dependent Kinase-like 5                                                               |
| DCAMKL1 (DCLK1)           | 9  | Doublecortin-like Kinase 1                                                                   |
| CSNK1G2 (CK1 gamma 2)     | 9  | Casein Kinase 1 gamma 2                                                                      |
| MAP2K6 (MKK6)             | 9  | Mitogen Activated Protein Kinase Kinase 6                                                    |
| KSR2                      | 9  | Kinase Suppressor of Ras 2                                                                   |
| PAK1                      | 9  | P21 Activated Kinase 1                                                                       |
| TTK                       | 8  | TTK Protein Kinase                                                                           |
| PIK3C2G (PI3K-C2 gamma)   | 8  | Phosphoinositide-3-Kinase, class 2, gamma polypeptide                                        |
| MAPKAPK3                  | 8  | Mitogen-Activated Protein Kinase-Activated Protein Kinase 3                                  |
| PRKD2 (PKD2)              | 8  | Protein Kinase D2                                                                            |
| PRKACG (PRKAC gamma)      | 8  | Protein Kinase, cAMP-dependent, catalytic, gamma                                             |
| AMPK (A2/B1/G3)           | 8  | AMP-activated Protein Kinase?                                                                |
| PAK2 (PAK65)              | 8  | p21 (CDKN1A)-activated kinase 2                                                              |
| FGFR4                     | 8  | Fibroblast Growth Factor Receptor 4                                                          |
| FYN                       | 8  | FYN oncogene related to SRC, FGR, YES                                                        |
| INSRR (IRR)               | 8  | Insulin Receptor-Related Receptor                                                            |
| MAP4K3 (GLK)              | 8  | Mitogen-Activated Protein Kinase Kinase Kinase Kinase 3                                      |
| MAP4K5 (KHS1)             | 8  | Mitogen-Activated Protein Kinase Kinase Kinase Kinase 5                                      |
| CAMK4 (CaMKIV)            | 8  | Calcium/calmodulin-Dependent Protein Kinase IV                                               |
| ULK3                      | 8  | Unc-51-like kinase 3                                                                         |
| CAMK2D (CaMKII delta)     | 8  | Calcium/calmodulin-Dependent Protein Kinase (CaM kinase) II delta                            |
| PDK1                      | 8  | 3-Phosphoinositide Dependent Protein Kinase-1                                                |
| CDK5 (Inactive)           | 8  | Cyclin Dependent Kinase 5                                                                    |
| ROCK2                     | 8  | Rho Associated, Coiled Coil Containing Protein Kinase 2                                      |
| MAPKAPK2                  | 8  | MAPK Activated Protein Kinase-2                                                              |
| IRAK1                     | 8  | Interleukin-1 Receptor-associated Kinase 1                                                   |
| PRKCQ (PKC theta)         | 8  | Protein Kinase C theta                                                                       |
| PAK6                      | 8  | p21 Activated Kinase 6                                                                       |
| FRK (PTK5)                | 8  | Fyn-related Kinase                                                                           |
| TNIK                      | 8  | TRAF2 and NCK Interacting Kinase                                                             |
| STK32B (YANK2)            | 7  | Serine/Threonine Kinase 32B                                                                  |
| AMPK A2/B1/G1             | 7  | AMP-activated Protein Kinase?                                                                |
| LYN A                     | 7  | v-yes-1 Yamaguchi sarcoma viral related oncogene homolog                                     |
| MARK4                     | 7  | MAP/microtubule Affinity-Regulating Kinase 4                                                 |
| CSK                       | 7  | C-Src Kinase                                                                                 |
| PRKG1                     | 7  | Protein Kinase, cGMP-dependant, type 1                                                       |
| ROCK1                     | 7  | Rho Associated, Coiled Coil Containing Protein Kinase 1                                      |
| CLK1                      | 7  | CDC-like Kinase 1                                                                            |
| MASTL                     | 7  | Microtubule Associated Serine/threonine kinase like                                          |
| TNK1                      | 7  | Tyrosine Kinase, non-Receptor, 1                                                             |
| TEC                       | 7  | Tec protein tyrosine kinase                                                                  |

|                       |   |                                                                                                           |
|-----------------------|---|-----------------------------------------------------------------------------------------------------------|
| LATS2                 | 7 | LATS, large tumor suppressor, homolog 2 (Drosophila)                                                      |
| ACVRL1 (ALK1)         | 7 | Activin A Receptor Type II-like 1                                                                         |
| SLK                   | 7 | STE20-like kinase                                                                                         |
| HIPK4                 | 7 | Homeodomain Interacting Protein Kinase 4                                                                  |
| HCK                   | 7 | Hemopoietic Cell Kinase                                                                                   |
| RET V804L             | 7 | Ret Proto-oncogene (multiple endocrine neoplasia and medullary thyroid carcinoma 1, Hirschsprung disease) |
| ULK1                  | 7 | Unc-51-like Kinase 1 (C. elegans)                                                                         |
| LCK                   | 6 | Lymphocyte-Specific Protein Tyrosine Kinase                                                               |
| GRK6                  | 6 | G protein-coupled receptor kinase 6                                                                       |
| CAMKK2 (CaMKK beta)   | 6 | Calmodulin Dependent Kinase Kinase Beta                                                                   |
| RPS6KB1 (p70S6K)      | 6 | P70S6 Kinase                                                                                              |
| ERN1                  | 6 | Endoplasmic Reticulum to Nucleus Signaling 1                                                              |
| CAMK2G (CaMKII gamma) | 6 | Calcium/calmodulin-Dependent Protein Kinase (CaM kinase) II gamma                                         |
| MAP4K4 (HGK)          | 6 | Mitogen Activated Protein Kinase Kinase Kinase Kinase 4                                                   |
| PRKG2 (PKG2)          | 6 | Protein Kinase, cGMP-dependent, type II                                                                   |
| NEK1                  | 6 | NIMA (never in mitosis gene a)-related Kinase 1                                                           |
| ACVR2B                | 6 | Activin A Receptor, type IIB                                                                              |
| GSG2 (Haspin)         | 6 | germ cell associated 2 haspin                                                                             |
| IGF1R                 | 6 | Insulin Like Growth Factor Receptor 1                                                                     |
| EGFR (ErbB1)          | 6 | Epidermal Growth Factor Receptor                                                                          |
| PRKCZ (PKC zeta)      | 6 | Protein Kinase C zeta                                                                                     |
| CDK18/cyclin Y        | 6 | PCTAIRE Protein Kinase 3                                                                                  |
| PEAK1                 | 6 | Pseudopodium Enriched Atypical kinase 1                                                                   |
| PRKD1 (PKC mu)        | 6 | Protein Kinase D1                                                                                         |
| CDK2/cyclin O         | 6 | Cyclin Dependent Kinase 2:Cyclin O                                                                        |
| TNK2 (ACK)            | 6 | Tyrosine Kinase, non-Receptor, 2                                                                          |
| DMPK                  | 6 | Dystrophia Myotonica-protein Kinase                                                                       |
| RPS6KA4 (MSK2)        | 6 | Ribosomal Protein S6 Kinase polypeptide 4                                                                 |
| TGFBR2                | 6 | Transforming Growth Factor - Beta Receptor Type 2                                                         |
| AKT3 (PKB gamma)      | 6 | v-akt murine thymoma viral oncogene homolog 3                                                             |
| MAPK8 (JNK1)          | 6 | Mitogen Activated Protein Kinase 8                                                                        |
| GRK5                  | 6 | G protein-coupled receptor kinase 5                                                                       |
| FGFR3                 | 5 | Fibroblast Growth Factor Receptor 3                                                                       |
| CAMK1G (CAMKI gamma)  | 5 | Calcium/Calmodulin-dependent Protein Kinase IG                                                            |
| PKMYT1                | 5 | Protein Kinase, Membrane Associated Tyrosine/Threonine 1                                                  |
| PIM1                  | 5 | PIM 1 oncogene                                                                                            |
| CSNK1E (CK1 epsilon)  | 5 | Casein Kinase 1, epsilon                                                                                  |
| NEK7                  | 5 | NIMA (never in mitosis gene a)-Related Kinase 7                                                           |
| PRKACB (PRKAC beta)   | 5 | Protein Kinase, cAMP-dependent, catalytic, beta                                                           |
| AURKA (Aurora A)      | 5 | Aurora Kinase A                                                                                           |
| AURKC (Aurora C)      | 5 | Aurora Kinase C                                                                                           |
| CDK9/cyclin T1        | 5 | Cyclin Dependent Kinase 9:Cyclin T                                                                        |
| PLK2                  | 5 | Polo-like Kinase 2                                                                                        |
| MAPK13 (p38 delta)    | 5 | Mitogen Activated Protein Kinase 13                                                                       |
| CDK8/cyclin C         | 5 | Cyclin Dependent Kinase 8:Cyclin C                                                                        |
| TLK2                  | 5 | Tousled-like Kinase 2                                                                                     |
| STK17A (DRAK1)        | 5 | Serine/Threonine Kinase 17a (apoptosis-inducing)                                                          |
| YES1                  | 5 | v-yes-1 Yamaguchi Sarcoma Viral Oncogene Homolog 1                                                        |
| DDR2                  | 5 | Discoidin Domain Receptor Family Member 2                                                                 |
| EPHA5                 | 5 | EPH Receptor A5                                                                                           |
| CSNK1A1L              | 4 | Casein Kinase 1, alpha 1-like                                                                             |
| MAPK3 (ERK1)          | 4 | Mitogen Activated Protein Kinase 3                                                                        |
| DYRK3                 | 4 | Dual Specificity Tyrosine Phosphorylated Regulated Kinase 3                                               |
| RPS6KA1 (RSK1)        | 4 | MAPK Activated Protein Kinase-1a                                                                          |
| MKNK2 (MNK2)          | 4 | MAP Kinase Interacting Serine/Threonine Kinase 2                                                          |
| BMX                   | 4 | BMX Non-Receptor Tyrosine Kinase                                                                          |
| PDGFRB (PDGFR beta)   | 4 | Platelet Derived Growth Factor Receptor Beta                                                              |
| LIMK1                 | 4 | LIM Domain Kinase 1                                                                                       |
| JAK2 JH1 JH2          | 4 | Janus Kinase 2                                                                                            |
| AMPK (A1/B1/G2)       | 4 | AMP-activated Protein Kinase?                                                                             |
| PI4K2A (PI4K2 alpha)  | 4 | Phosphatidylinositol 4-kinase type 2 alpha                                                                |
| PDK1 Direct           | 4 | 3-Phosphoinositide Dependent Protein Kinase-1                                                             |

|                              |   |                                                                  |
|------------------------------|---|------------------------------------------------------------------|
| DYRK2                        | 4 | Dual Specificity Tyrosine Phosphorylation Regulated Kinase 2     |
| CSF1R (FMS)                  | 4 | Colony Stimulating Factor 1 Receptor                             |
| BRAF                         | 4 | v-raf Murine Sarcoma Viral Oncogene Homolog B1                   |
| FLT4 (VEGFR3)                | 4 | Vascular endothelial growth factor receptor 3                    |
| NEK8                         | 4 | NIMA (never in mitosis gene a)- related Kinase 8                 |
| EPHA3                        | 4 | EPH Receptor A3                                                  |
| STK23 (MSSK1)                | 4 | Serine/Threonine Kinase 23                                       |
| CDK2/cyclin A                | 4 | Cyclin Dependent Kinase 2:Cyclin A                               |
| GRK7                         | 4 | G Protein-coupled Receptor Kinase 7                              |
| AMPK (A2/B2/G2)              | 4 | AMP-activated Protein Kinase?                                    |
| PTK2B (FAK2)                 | 4 | PTK2B Protein Tyrosine Kinase 2 beta                             |
| MAPK12 (p38 gamma)           | 4 | Mitogen-Activated Protein Kinase 12                              |
| MARK3                        | 4 | MAP / Microtubule Affinity-Regulating Kinase 3                   |
| ACVR2A                       | 4 | Activin A Receptor, type IIA                                     |
| CAMK2B (CaMKII beta)         | 3 | Calcium/calmodulin-Dependent Protein Kinase (CaM kinase) II beta |
| MYO3B (MYO3 beta)            | 3 | Myosin IIIB                                                      |
| MAPK14 (p38 alpha) Direct    | 3 | Mitogen-Activated Protein Kinase 14                              |
| STK3 (MST2)                  | 3 | Serine/Threonine Kinase 3 (STE20 homolog, yeast)                 |
| STK22B (TSSK2)               | 3 | Testis-specific Serine Kinase 2                                  |
| PRKX                         | 3 | Protein Kinase, X-linked                                         |
| AAK1                         | 3 | AP2 Associated Kinase 1                                          |
| MAPKAPK2                     | 3 | MAPK Activated Protein Kinase-2                                  |
| CHUK (IKK alpha)             | 3 | I Kappa B Kinase 1                                               |
| MAP2K6 (MKK6)                | 3 | Mitogen Activated Protein Kinase Kinase 6                        |
| FLT1 (VEGFR1)                | 3 | Vascular Endothelial Growth Factor Receptor 1                    |
| NEK4                         | 3 | NIMA (never in mitosis gene a)- related Kinase 4                 |
| CLK2                         | 3 | CDC-like kinase 2                                                |
| PTK6 (Brk)                   | 3 | Protein Tyrosine Kinase 6                                        |
| RPS6KA3 (RSK2)               | 3 | MAPK Activated Protein Kinase-1b                                 |
| MAP3K7/MAP3K7IP1 (TAK1-TAB1) | 3 | Mitogen-Activated Protein Kinase Kinase Kinase 7                 |
| TGFBR1 (ALK5)                | 3 | Transforming growth factor, beta receptor I                      |
| EPHB2                        | 3 | EPH Receptor B2                                                  |
| MARK2                        | 3 | MAP/microtubule Affinity-Regulating Kinase 2                     |
| MARK1 (MARK)                 | 3 | MAP/microtubule Affinity-Regulating Kinase 1                     |
| TYK2                         | 3 | Tyrosine Kinase 2                                                |
| NEK9                         | 3 | NIMA (never in mitosis gene a)- related Kinase 9                 |
| ROS1                         | 3 | v-ros UR2 Sarcoma Virus Oncogene Homolog 1                       |
| PTK2 (FAK)                   | 3 | Focal Adhesion Kinase 1                                          |
| FGFR1 V561M                  | 3 | Fibroblast Growth Factor Receptor 1                              |
| PDGFRA (PDGFR alpha)         | 3 | Platelet Derived Growth Factor Receptor Alpha                    |
| EPHA7                        | 3 | EPH Receptor A7                                                  |
| TXK                          | 3 | TXK Tyrosine Kinase                                              |
| HIPK3 (YAK1)                 | 3 | Homeodomain-interacting Protein Kinase 3                         |
| WEE1                         | 3 | WEE1 homolog (S. pombe)                                          |
| PIM3                         | 2 | PIM 3 oncogene                                                   |
| ADRBK1 (GRK2)                | 2 | Adrenergic, Beta Receptor Kinase 1                               |
| PAK7 (KIAA1264)              | 2 | p21 Activated Kinase 5                                           |
| HIPK1 (Myak)                 | 2 | Homeodomain Interacting Protein Kinase 1                         |
| EPHB1                        | 2 | EPH Receptor B1                                                  |
| ICK                          | 2 | Lymphocyte-Specific Protein Tyrosine Kinase                      |
| DCAMKL2 (DCK2)               | 2 | Doublecortin and CaM Kinase-like 2                               |
| CDK5/p35                     | 2 | Cyclin Dependent Kinase 5                                        |
| ERN2                         | 2 | Endoplasmic Reticulum to Nucleus signaling 2                     |
| MAP4K2 (GCK)                 | 2 | Mitogen-Activated Protein Kinase Kinase Kinase Kinase 2          |
| FES (FPS)                    | 2 | FES proto-oncogene, tyrosine kinase                              |
| IKKB (IKK beta)              | 2 | I Kappa B Kinase 2                                               |
| ERBB4 (HER4)                 | 2 | v-erb-a erythroblastic leukemia viral oncogene homolog 4         |
| FGFR1                        | 2 | Fibroblast Growth Factor Receptor 1                              |
| SGK (SGK1)                   | 2 | Serum Glucocorticoid-regulated Kinase 1                          |
| PRKCB1 (PKC beta I)          | 2 | Protein Kinase C beta 1                                          |
| ABL2 (Arg)                   | 2 | v-abl Abelson Murine Leukemia Viral oncogene homolog 2           |
| MAPK9 (JNK2)                 | 2 | Mitogen Activated Protein Kinase 9                               |

|                                     |    |                                                                                                           |
|-------------------------------------|----|-----------------------------------------------------------------------------------------------------------|
| CDK14 (PFTK1)/cyclin Y              | 2  | PFTAIRE Protein Kinase 1                                                                                  |
| NEK2                                | 2  | NIMA (never in mitosis gene a)-related Kinase 2                                                           |
| GSK3A (GSK3 alpha)                  | 2  | Glycogen Synthase Kinase-3 alpha                                                                          |
| CDK1/cyclin A2                      | 2  | Cyclin-Dependent kinase 1:Cyclin A2                                                                       |
| EPHB3                               | 2  | EPH Receptor B3                                                                                           |
| PRKCH (PKC eta)                     | 2  | Protein Kinase C eta                                                                                      |
| MYLK (MLCK)                         | 1  | Myosin, Light chain Kinase                                                                                |
| DYRK4                               | 1  | Dual-Specificity Tyrosine Phosphorylation Regulated kinase 4                                              |
| HIPK2                               | 1  | Homeodomain-interacting Protein Kinase 2                                                                  |
| EPHA1                               | 1  | EPH Receptor A1                                                                                           |
| CDC7/DBF4                           | 1  | Cell Division Cycle 7 Homolog ( <i>S. cerevisiae</i> )                                                    |
| ULK2                                | 1  | Unc-51-Like Kinase 2                                                                                      |
| PASK                                | 1  | PAS Domain Containing Serine/threonine Kinase                                                             |
| MAPKAPK5 (PRAK)                     | 1  | p38 Regulated Activated Kinase                                                                            |
| BTK                                 | 1  | Bruton agammaglobulinemia Tyrosine Kinase                                                                 |
| RPS6KA5 (MSK1)                      | 1  | Mitogen and Stress Activated Protein Kinase 1                                                             |
| CDK9 (Inactive)                     | 1  | Cyclin-Dependent Kinase 9 (CDC2-related kinase)                                                           |
| CDK11 (Inactive)                    | 1  | Cyclin-Dependent Kinase 19                                                                                |
| DAPK3 (ZIPK)                        | 1  | Death-Associated Protein Kinase 3                                                                         |
| CDK1/cyclin B                       | 1  | Cyclin Dependent Kinase 1:Cyclin B                                                                        |
| SRPK1                               | 1  | SFRS Protein Kinase 1                                                                                     |
| EPHA2                               | 1  | EPH Receptor A2                                                                                           |
| CSNK1D (CK1 delta)                  | 1  | Casein Kinase 1 delta                                                                                     |
| GSK3B (GSK3 beta)                   | 1  | Glycogen Synthase Kinase-3 beta                                                                           |
| NTRK3 (TRKC)                        | 1  | Neurotrophic Tyrosine Kinase, Receptor, type 3                                                            |
| PI4KA (PI4K alpha)                  | 1  | Phosphatidylinositol 4-kinase type III alpha                                                              |
| TAOK1                               | 1  | TAO kinase 1                                                                                              |
| CDC42 BPB (MRCKB)                   | 0  | CDC42 Binding Protein Kinase beta (DMPK-like)                                                             |
| MLCK (MLCK2)                        | 0  | Myosin Light Chain Kinase 3                                                                               |
| ZAK                                 | 0  | Sterile Alpha Motif and Leucine Zipper containing Kinase AZK                                              |
| BLK                                 | 0  | B Lymphoid Tyrosine Kinase                                                                                |
| FER                                 | 0  | Fer (fps/fes related) Tyrosine Kinase phosphoprotein NCP94                                                |
| AMPK A2/B1/G1                       | 0  | AMP-activated Protein Kinase?                                                                             |
| PAK4                                | 0  | P21 Activated Kinase 4                                                                                    |
| NTRK2 (TRKB)                        | 0  | Neurotrophic Receptor Tyrosine Kinase Type 2                                                              |
| AMPK (A1/B1/G3)                     | 0  | AMP-activated Protein Kinase?                                                                             |
| NIM1K                               | 0  | Serine/threonine-protein Kinase NIM1                                                                      |
| CLK3                                | 0  | CDC-like Kinase 3                                                                                         |
| CDK9/cyclin K                       | 0  | Cyclin-Dependent Kinase 9 (CDC2-related kinase)                                                           |
| AMPK (A2/B1/G2)                     | 0  | AMP-activated Protein Kinase?                                                                             |
| PLK1                                | 0  | Polo-like Kinase 1                                                                                        |
| RET                                 | 0  | Ret Proto-oncogene (multiple endocrine neoplasia and medullary thyroid carcinoma 1, Hirschsprung disease) |
| PI4K2B (PI4K2 beta)                 | 0  | Phosphatidylinositol 4 Kinase?                                                                            |
| MAPK15 (ERK7)                       | 0  | Mitogen-Activated Protein Kinase 15                                                                       |
| ALK                                 | 0  | Anaplastic Lymphoma Kinase                                                                                |
| PLK4                                | 0  | Polo-like Kinase 4 ( <i>Drosophila</i> )                                                                  |
| AKT1 (PKB alpha)                    | 0  | v-akt murine thymoma viral oncogene homolog 1                                                             |
| SIK1                                | 0  | Salt-Inducible kinase 1                                                                                   |
| INSR                                | 0  | Insulin Receptor                                                                                          |
| TLK1                                | 0  | Tousled-like Kinase 1                                                                                     |
| SYK                                 | 0  | Spleen tyrosine kinase                                                                                    |
| MLK4                                | 0  | Mixed Lineage Kinase 4                                                                                    |
| AMPK (A1/B2/G1)                     | 0  | AMP-activated Protein Kinase?                                                                             |
| MAP3K10 (MLK2)                      | -1 | Mitogen-Activated Protein Kinase Kinase Kinase 10                                                         |
| ABL1                                | -1 | v-abl Abelson Murine Leukemia Viral oncogene homolog 1                                                    |
| GAK                                 | -1 | Cyclin G Associated Kinase                                                                                |
| CAMK2A (CaMKII alpha)               | -1 | Calcium/calmodulin-Dependent Protein Kinase (CaM kinase) II, alpha                                        |
| PIK3CB/PIK3R1 (p110 beta/p85 alpha) | -1 | Phosphoinositide 3 Kinase Beta (PI3K Beta)                                                                |
| RIPK2                               | -1 | Receptor-Interacting serine/threonine Kinase 2                                                            |
| MAPK1 (ERK2)                        | -1 | Mitogen Activated Protein Kinase 1                                                                        |
| MAP3K11 (MLK3)                      | -1 | Mitogen-Activated Protein Kinase Kinase Kinase 11                                                         |

|                          |    |                                                                                                           |
|--------------------------|----|-----------------------------------------------------------------------------------------------------------|
| LTK (TYK1)               | -1 | Leukocyte Tyrosine Kinase                                                                                 |
| FGR                      | -1 | Gardner-Rasheed feline sarcoma viral (v-fgr) oncogene homolog                                             |
| EPHB4                    | -1 | EPH receptor B4                                                                                           |
| CLK4                     | -2 | CDC-like Kinase 4                                                                                         |
| EIF2AK2 (PKR)            | -2 | Eukaryotic Translation Initiation Factor 2-alpha Kinase 2                                                 |
| AMPK (A2/B2/G3)          | -2 | AMP-activated Protein Kinase?                                                                             |
| MYO3A (MYO3 alpha)       | -2 | Myosin IIIA                                                                                               |
| STK33                    | -2 | Serine/Threonine Kinase 33                                                                                |
| PLK3                     | -2 | Polo-like Kinase 3                                                                                        |
| MAP3K14 (NIK)            | -2 | Mitogen-Activated Protein Kinase Kinase Kinase 14                                                         |
| LRRK2 FL                 | -2 | Leucine-rich Repeat Kinase 2                                                                              |
| CDK16 (PCTK1)/cyclin Y   | -2 | PCTAIRE Protein Kinase 1                                                                                  |
| MAP3K19 (YSK4)           | -2 | Yeast Sps1/Ste20-Related Kinase 4 (S. cerevisiae)                                                         |
| EGFR (ErbB1) T790M L858R | -2 | Epidermal Growth Factor Receptor                                                                          |
| MAPK10 (JNK3)            | -2 | Mitogen-activated protein kinase 10                                                                       |
| CSNK1G3 (CK1 gamma 3)    | -2 | Casein Kinase 1 gamma 3                                                                                   |
| BRSK2                    | -2 | BR Serine/Threonine Kinase 2                                                                              |
| MAP2K2 (MEK2)            | -2 | Mitogen-Activated Protein Kinase Kinase 2                                                                 |
| NUAK2                    | -2 | NUAK Family, SNF1-like Kinase, 2                                                                          |
| MET (cMet)               | -2 | c-met Tyrosine Kinase (MTK)                                                                               |
| BMPR2                    | -3 | Bone Morphogenetic Protein Receptor, type II (Serine/Threonine Kinase)                                    |
| CDK5/p25                 | -3 | Cyclin Dependent Kinase 5                                                                                 |
| MAP3K8 (COT)             | -3 | Mitogen-Activated Protein Kinase Kinase Kinase 8                                                          |
| ADRBK2 (GRK3)            | -3 | Adrenergic, Beta Receptor kinase 2                                                                        |
| CAMK1D (CaMKI delta)     | -3 | Calcium/calmodulin-Dependent Protein Kinase I delta                                                       |
| SPHK2                    | -3 | Sphingosine Kinase 2                                                                                      |
| RET V804M                | -3 | Ret Proto-oncogene (multiple endocrine neoplasia and medullary thyroid carcinoma 1, Hirschsprung disease) |
| ADCK3                    | -3 | Chaperone, ABC1 activity of bc1 complex homolog (S. pombe)                                                |
| MAP2K5 (MEK5)            | -3 | Mitogen-activated Protein Kinase Kinase 5                                                                 |
| AMPK (A2/B2/G1)          | -3 | AMP-activated Protein Kinase?                                                                             |
| MAP3K2 (MEKK2)           | -3 | Mitogen-Activated Protein Kinase Kinase Kinase 2                                                          |
| FRAP1 (mTOR)             | -3 | FK506 binding protein 12-rapamycin associated protein 1                                                   |
| MAP3K5 (ASK1)            | -4 | Mitogen-Activated Protein Kinase Kinase Kinase 5                                                          |
| PRKCD (PKC delta)        | -4 | Protein Kinase C delta                                                                                    |
| MKNK1 (MNK1)             | -4 | MAP Kinase Interacting Serine/Threonine Kinase 1                                                          |
| EPHA8                    | -4 | EPH Receptor A8                                                                                           |
| MYLK2 (skMLCK)           | -4 | Myosin Light Chain Kinase 2                                                                               |
| GRK1                     | -4 | G Protein-coupled Receptor Kinase 1                                                                       |
| STK4 (MST1)              | -4 | Serine/Threonine Kinase 4                                                                                 |
| CDK2/cyclin A1           | -4 | Cyclin Dependent Kinase 2:Cyclin A                                                                        |
| SRPK2                    | -5 | SFRS Protein Kinase 2                                                                                     |
| PIK3C2B (PI3K-C2 beta)   | -5 | Phosphoinositide-3-Kinase, class 2, beta polypeptide                                                      |
| MATK (HYL)               | -5 | Megakaryocyte-associated Tyrosine Kinase                                                                  |
| ITK                      | -5 | IL2 Inducible T Cell Kinase                                                                               |
| DDR1                     | -5 | Discoidin Domain Receptor family, member 1                                                                |
| ACVR1 (ALK2)             | -5 | Activin A Receptor, type I                                                                                |
| PIK3C3 (hVPS34)          | -5 | Phosphoinositide-3-kinase, Class 3                                                                        |
| CAMK1 (CaMK1)            | -6 | Calcium/Calmodulin-Dependent Protein Kinase 1                                                             |
| BMPR1A (ALK3)            | -6 | Bone Morphogenetic Protein Receptor, type IA                                                              |
| EPHA6                    | -6 | EPH Receptor A6                                                                                           |
| PRKCI (PKC iota)         | -6 | Protein Kinase C iota                                                                                     |
| DYRK1B                   | -6 | Dual-specificity Tyrosine Phosphorylation Regulated Kinase 1B                                             |
| RIPK3                    | -6 | Receptor-Interacting Serine-Threonine Kinase 3                                                            |
| JAK2                     | -7 | Janus Kinase 2                                                                                            |
| RPS6KA6 (RSK4)           | -7 | Ribosomal Protein S6 Kinase polypeptide 6                                                                 |
| SPHK1                    | -7 | Sphingosine Kinase 1                                                                                      |
| STK16 (PKL12)            | -7 | Serine/Threonine Kinase 16                                                                                |
| CHEK1 (CHK1)             | -7 | Checkpoint Kinase I                                                                                       |
| MINK1                    | -7 | Misshapen-like Kinase 1                                                                                   |
| ERBB2 (HER2)             | -7 | Erythroblastic leukemia viral oncogene homolog 2 Erythroblastic leukemia viral oncogene homolog 2         |
| TESK1                    | -7 | Testis-Specific Kinase 1                                                                                  |



|                                      |     |                                                                                                                         |
|--------------------------------------|-----|-------------------------------------------------------------------------------------------------------------------------|
| MAP3K9 (MLK1)                        | -8  | Mitogen-Activated Protein Kinase Kinase Kinase 9                                                                        |
| FGFR2                                | -8  | Fibroblast Growth Factor Receptor 2                                                                                     |
| BRSK1 (SAD1)                         | -8  | BR Serine/threonine Kinase 1                                                                                            |
| GRK4                                 | -8  | G Protein-coupled Receptor Kinase 4                                                                                     |
| AKT2 (PKB beta)                      | -8  | v-akt murine thymoma viral oncogene homolog 2                                                                           |
| LIMK2                                | -8  | LIM domain Kinase 2                                                                                                     |
| PRKACA (PKA)                         | -8  | Protein Kinase, cAMP-dependent, catalytic, alpha                                                                        |
| LRRK2                                | -9  | Leucine-rich Repeat Kinase 2                                                                                            |
| IRAK4                                | -9  | Interleukin-1 Receptor-Associated Kinase 4                                                                              |
| STK32C (YANK3)                       | -9  | Serine/Threonine Kinase 32C                                                                                             |
| DAPK1                                | -9  | Death-Associated Protein Kinase 1                                                                                       |
| JAK3                                 | -10 | Janus Kinase 3                                                                                                          |
| JAK1                                 | -10 | Janus Kinase 1                                                                                                          |
| STK39 (STLK3)                        | -10 | Serine Threonine Kinase 39 (STE20/SPS1 homolog, yeast)                                                                  |
| MAP3K3 (MEKK3)                       | -10 | Mitogen-Activated Protein Kinase Kinase Kinase 3                                                                        |
| WNK2                                 | -10 | WNK lysine deficient Protein Kinase 2                                                                                   |
| CDK3/cyclin E1                       | -10 | Cyclin Dependent Kinase 3:Cyclin E1                                                                                     |
| PIK3CA/PIK3R1 (p110 alpha/p85 alpha) | -11 | Phosphoinositide-3-kinase, catalytic, alpha Polypeptide:phosphoinositide-3-kinase, regulatory subunit 1 (alpha) Complex |
| MST1R (RON)                          | -11 | Macrophage Stimulating 1 Receptor (c-met-related tyrosine kinase)                                                       |
| PI4KB (PI4K beta)                    | -13 | Phosphatidylinositol 4-kinase type III beta                                                                             |
| CASK                                 | -13 | Calcium/calmodulin-dependent Serine Protein Kinase                                                                      |
| KIT                                  | -13 | cKIT                                                                                                                    |
| AURKB (Aurora B)                     | -13 | Aurora Kinase B                                                                                                         |
| PIK3CD/PIK3R1 (p110 delta/p85 alpha) | -15 | Phosphoinositide 3 Kinase Delta (PI3K Delta)                                                                            |
| FYN A                                | -15 | FYN oncogene related to SRC, FGR, YES                                                                                   |
| CDK2/cyclin E1                       | -17 | Cyclin Dependent Kinase 2:Cyclin E                                                                                      |
| MYLK4                                | -17 | Myosin Light Chain Kinase Family, member 4                                                                              |
| NUAK1 (ARK5)                         | -17 | AMPK-Related Protein Kinase 5                                                                                           |
| WNK3                                 | -18 | WNK lysine deficient Protein Kinase 3                                                                                   |
| HUNK                                 | -19 | Hormonally Upregulated Neu-associated Kinase                                                                            |
| PIM2                                 | -19 | PIM 2 oncogene                                                                                                          |
| EEF2K                                | -21 | Eukaryotic Elongation Factor 2 Kinase                                                                                   |

# Supplementary Figure 1

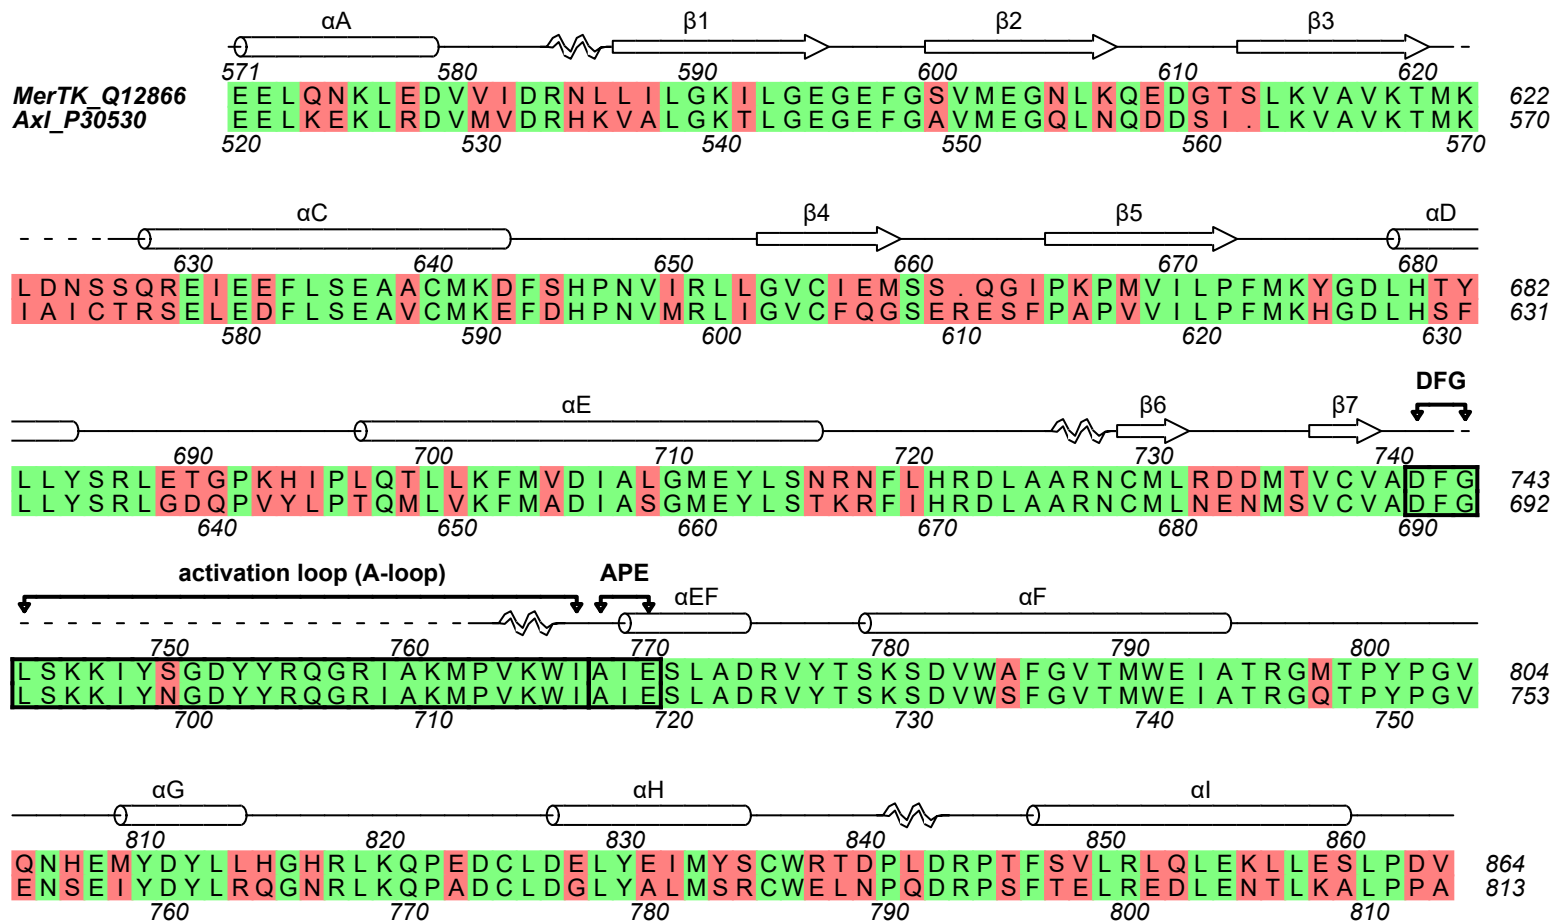

## Supplementary Figure 2

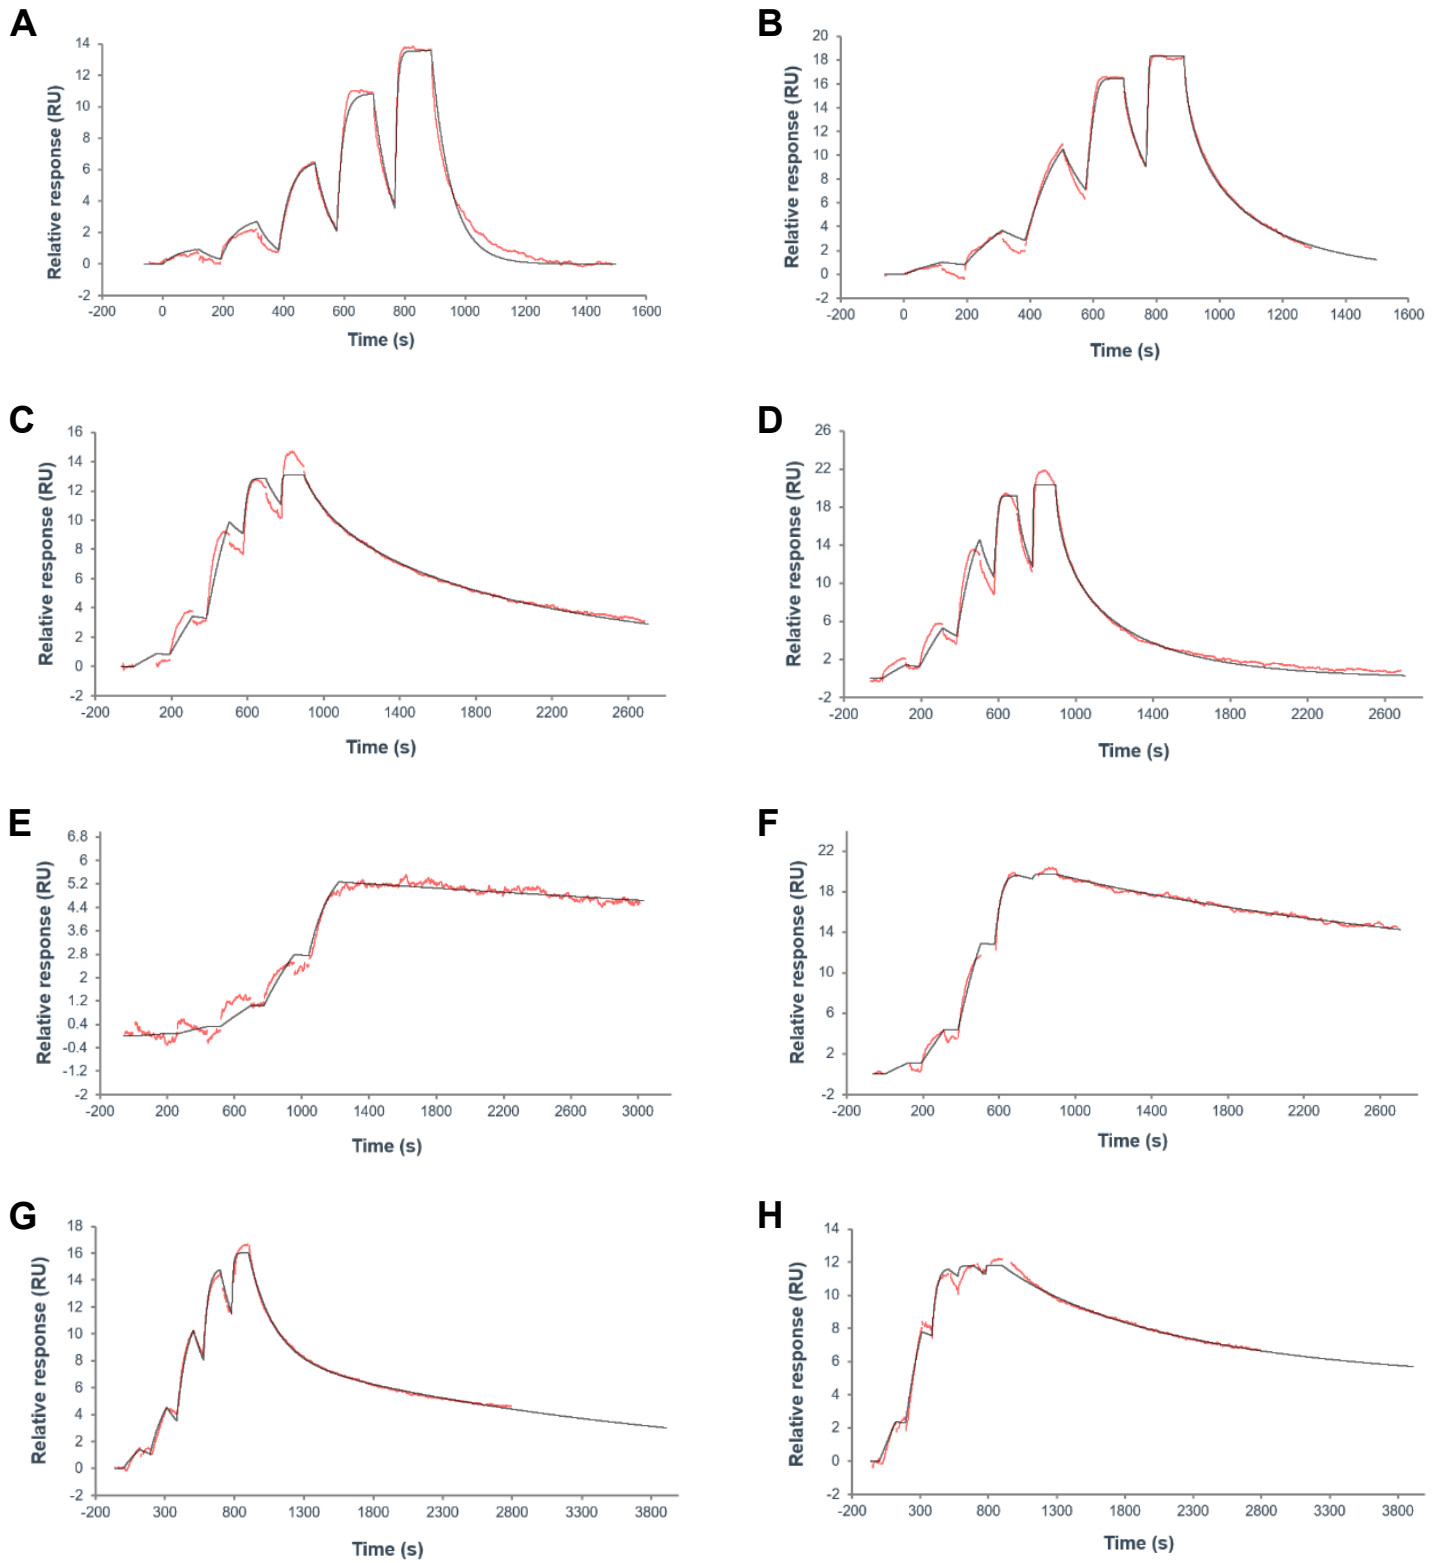

Supplement: BCJ-477-4443-s1.pdf [file BCJ-477-4443-s1.pdf]
